# Supplementary material for: Increasing glacier runoff in northwestern Greenland simulated from 1950 to 2023
Source: Copernicus journal article supplement (doi:10.5194/egusphere-2025-1893), 2025-06-10
Supplement: Supplementary file 1 [file egusphere-2025-1893-supplement.pdf]

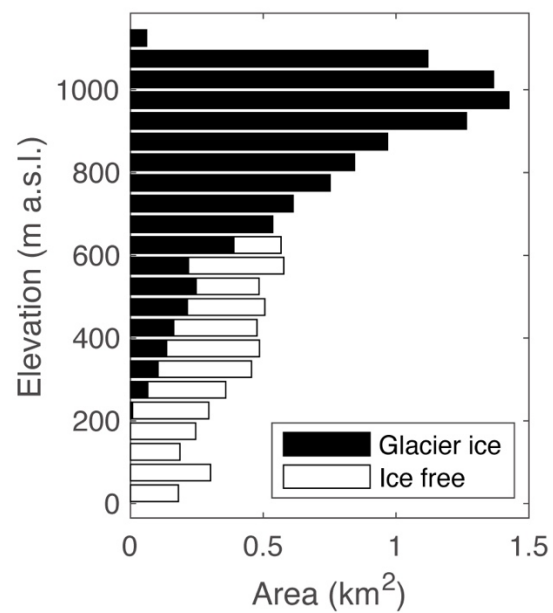

**Figure S1: Hypsometry of the catchment area of the outlet stream from Qaanaaq Glacier partitioned into glacier-covered (black) and ice-free (white) areas.**

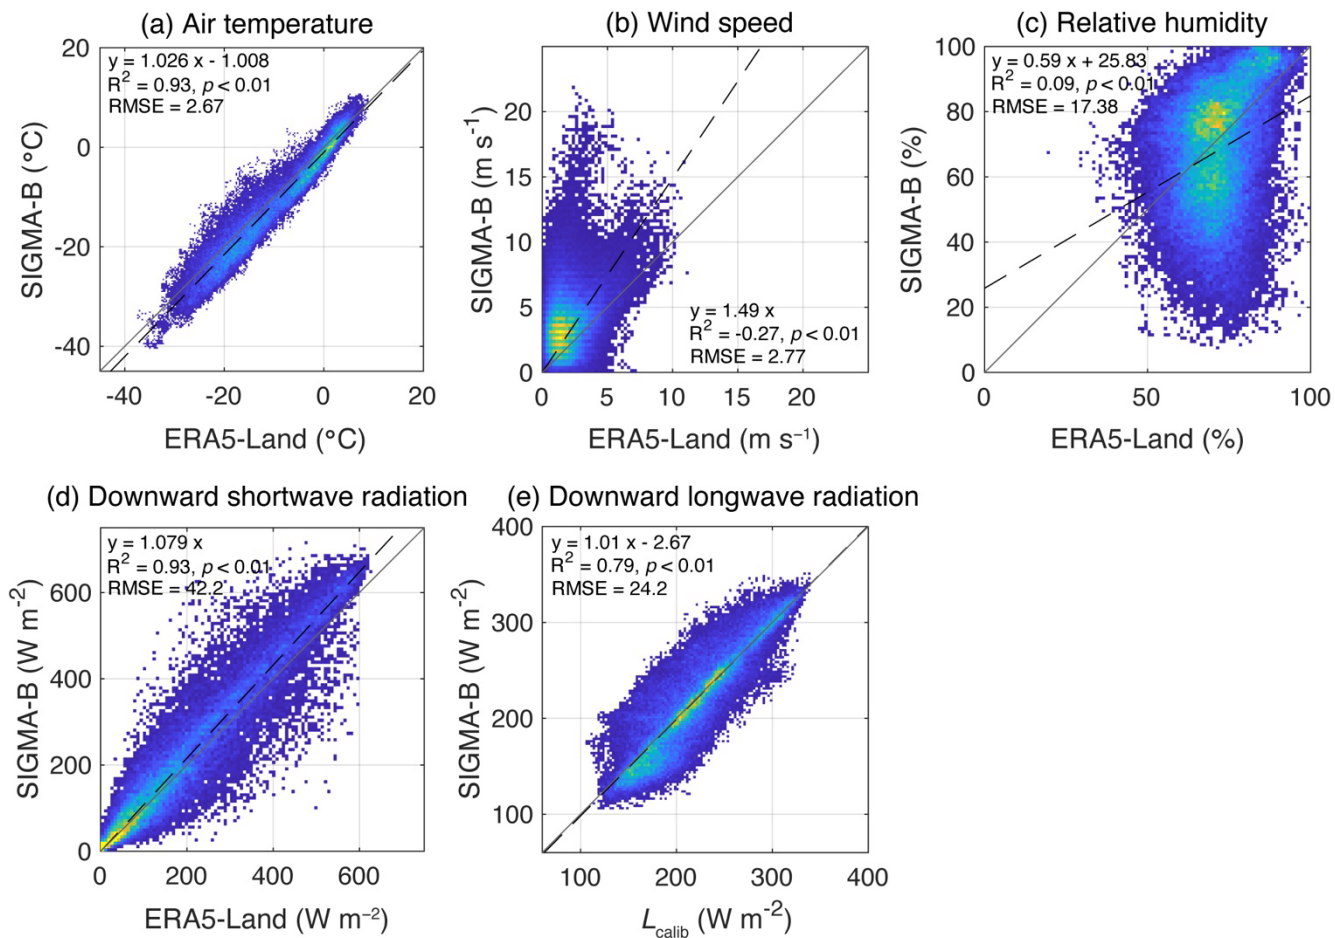

**Figure S2: Comparisons of the ERA5-Land data (horizontal axes) and observations at SIGMA-B (vertical axes) for (a) air temperature, (b) wind speed, (c) relative humidity, (d) downward shortwave radiation, and (e) downward longwave radiation ( $L_{\text{calib}}$ ). The dashed line indicates a linear regression through the data. The linear regression equation is shown along with the coefficient of determination ( $R^2$ ) and RMSE.**

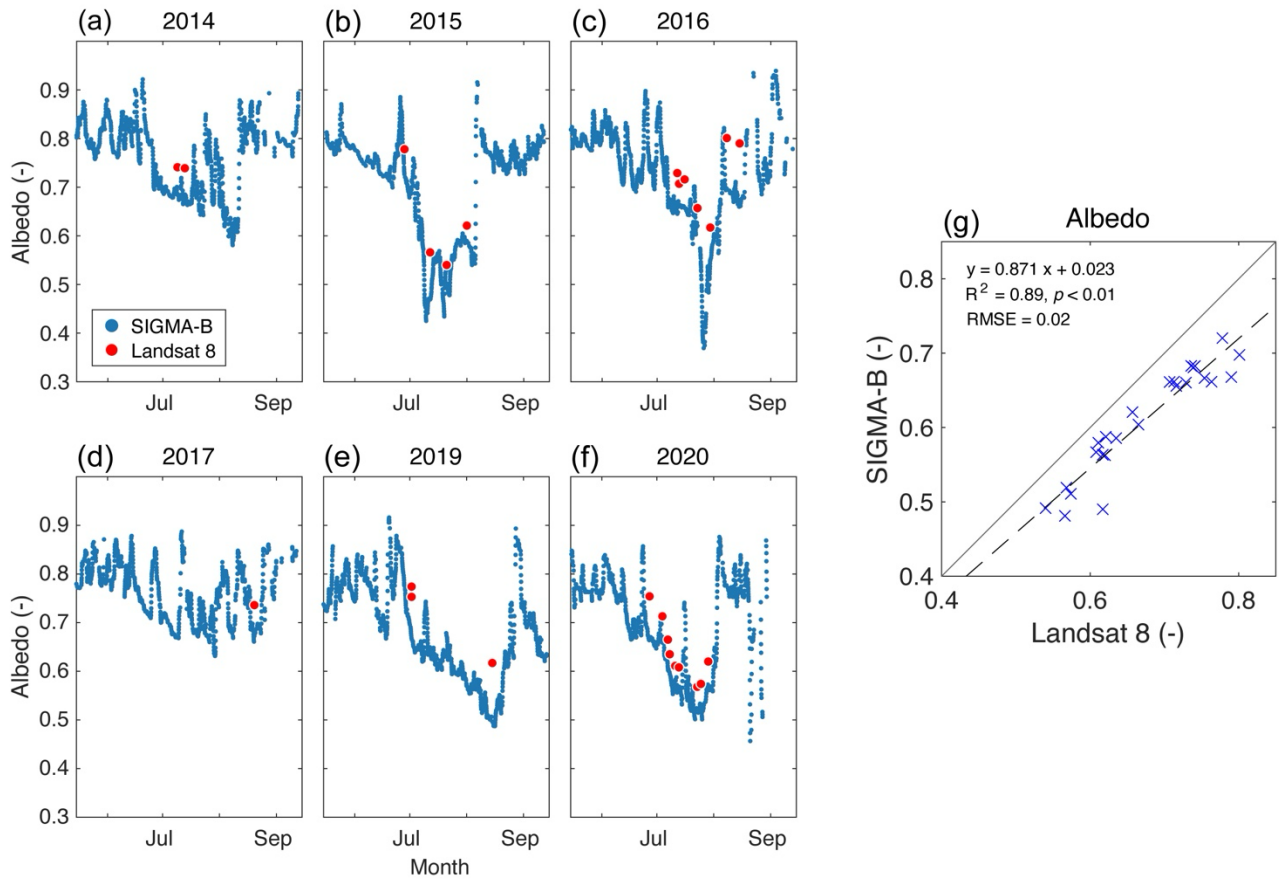

Figure S3: (a–f) Surface albedo observed at the SIGMA-B site by AWS (blue) and Landsat 8 (red) in 2014–2020. (g) Plot of the surface albedo observed by SIGMA-B AWS and Landsat 8. The linear regression equation is shown along with the coefficient of determination ( $R^2$ ) and RMSE.

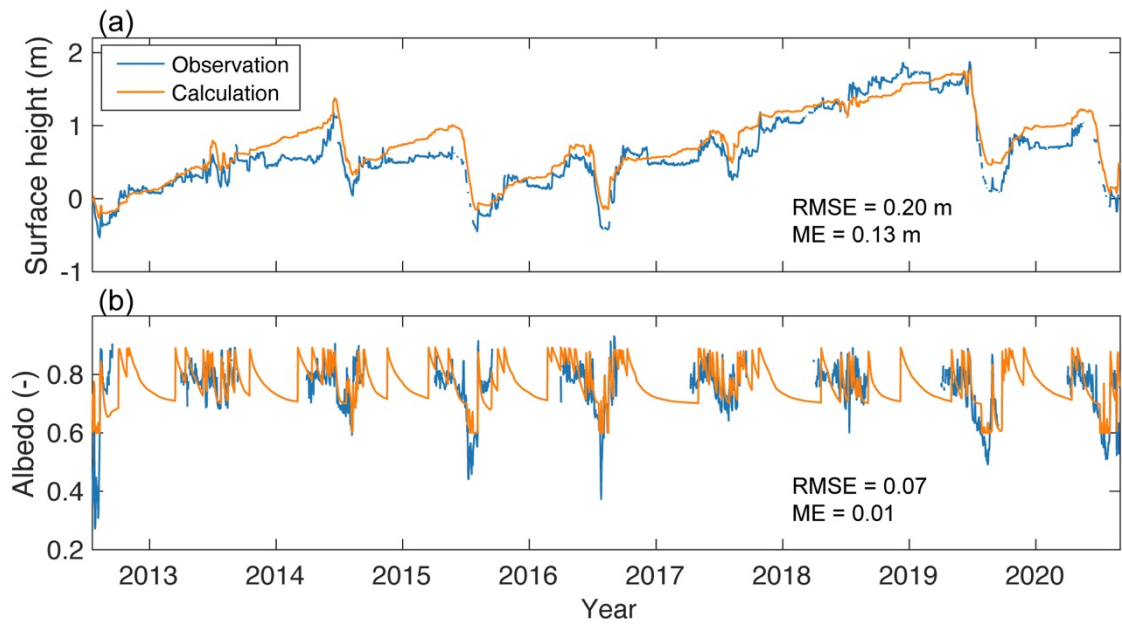

Figure S4: (a) Observed (blue) and calculated (orange) surface height changes and (b) albedo at the SIGMA-B site. The RMSE and ME are also shown.

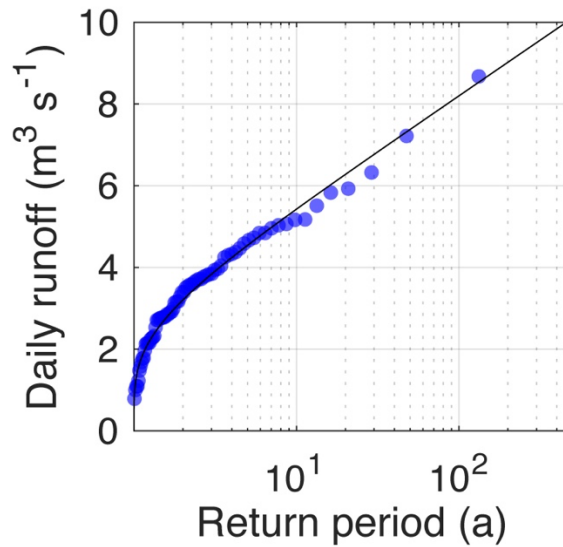

Figure S5: Return periods for the calculated daily runoff (circles) and cumulative distribution function of the fitted Gumbel distribution (black line).

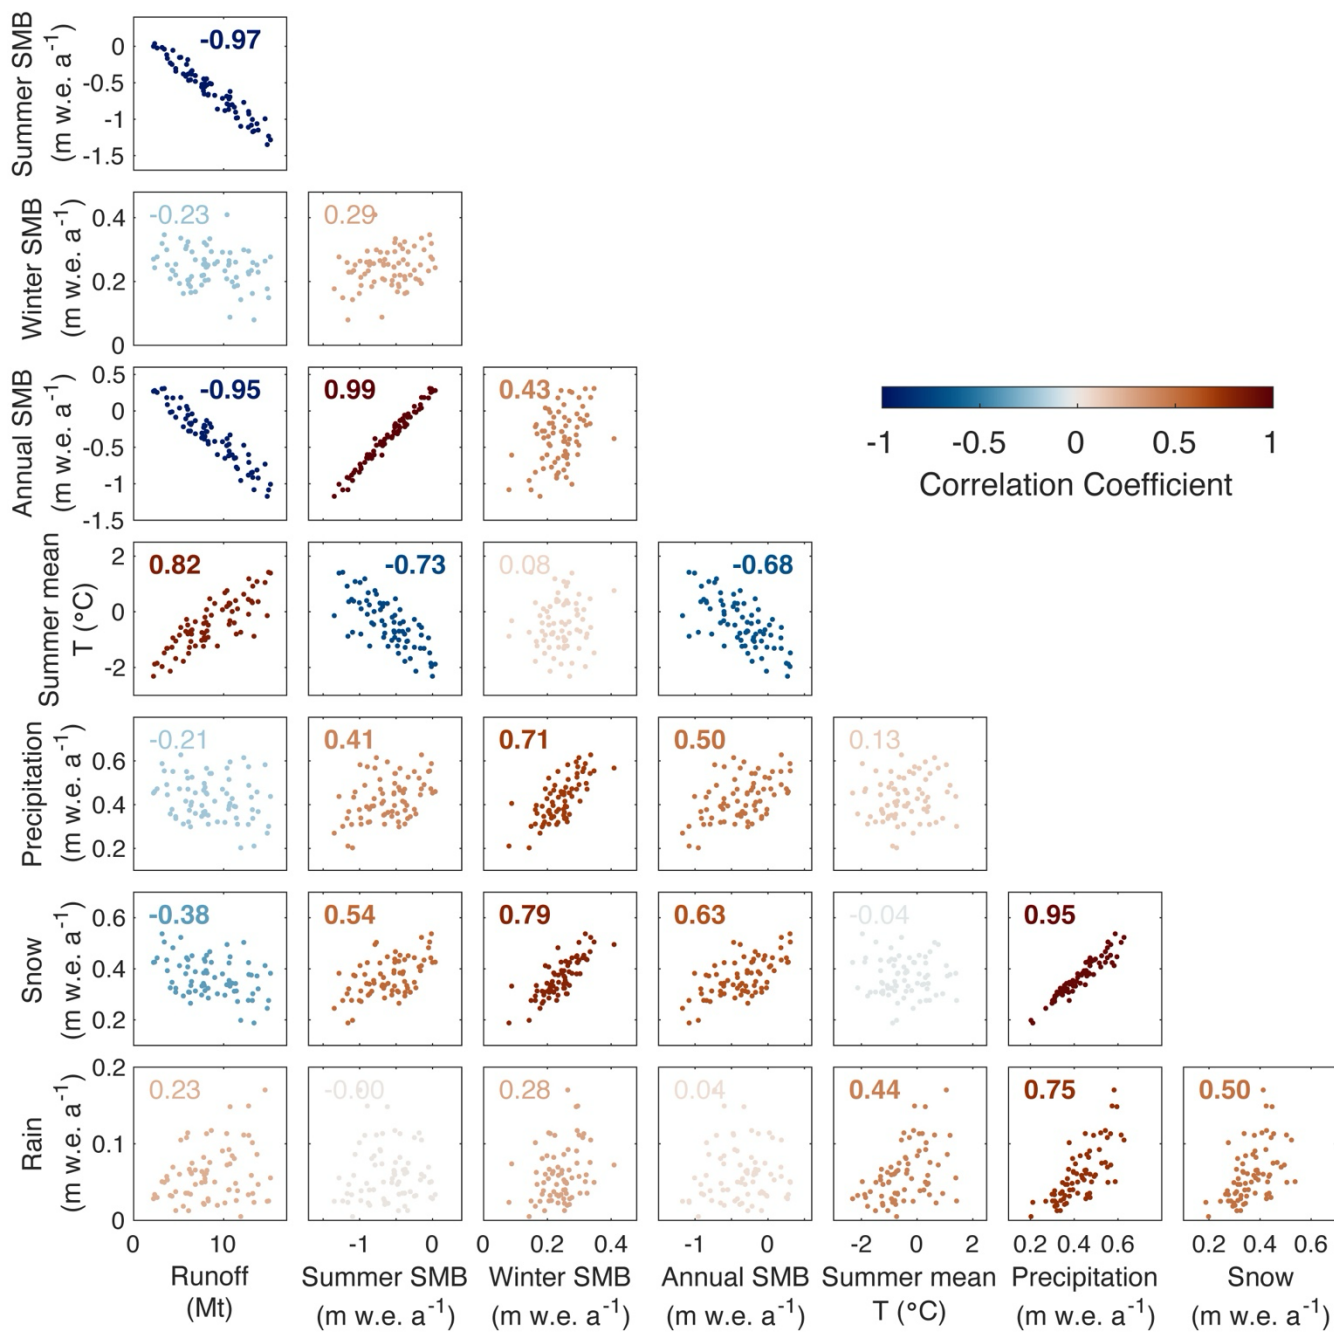

**Figure S6: Scatter plots and correlation coefficients for the model results and meteorological conditions shown in Fig. 6. The text and colors show the correlation coefficients. Bold text indicates correlations with  $p < 0.01$ .**

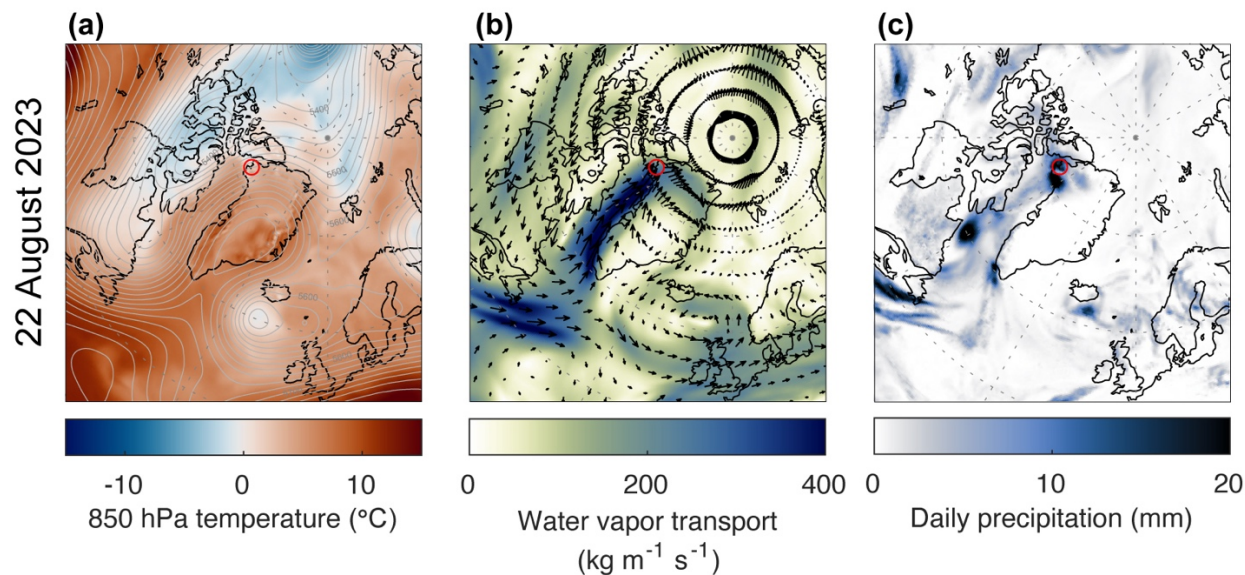

Figure S7: ERA5 reanalysis data for 22 August 2023. (a) Air temperature at 850 hPa geopotential (color) and height at 500 hPa geopotential (gray contours). (b) Vertically integrated water vapor transport (color) and wind vectors at 850 hPa geopotential (arrows). (c) Daily precipitation. The red circles indicate the location of Qaanaaq.

35

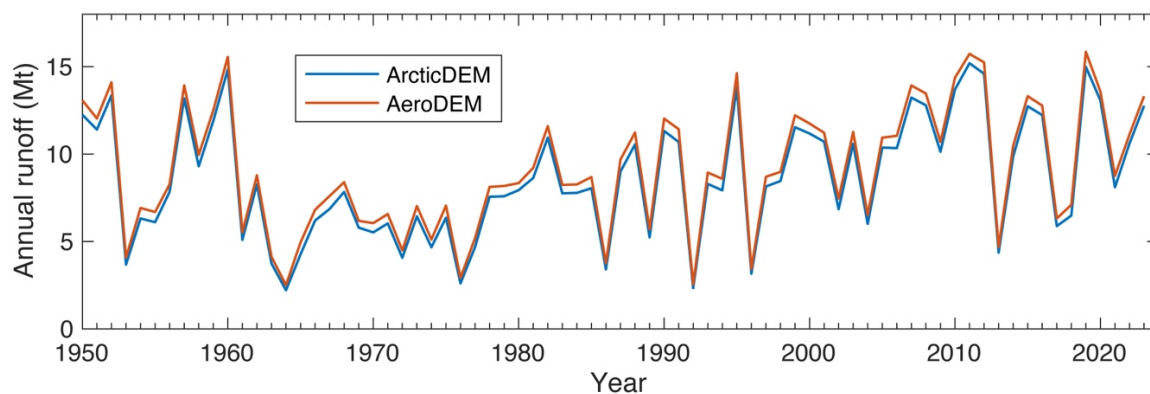

Figure S8: Annual runoff calculated using the area–altitude distribution derived from ArcticDEM Mosaic (blue) and AeroDEM (orange), based on data acquired in 2007–2022 and 1985, respectively.

40

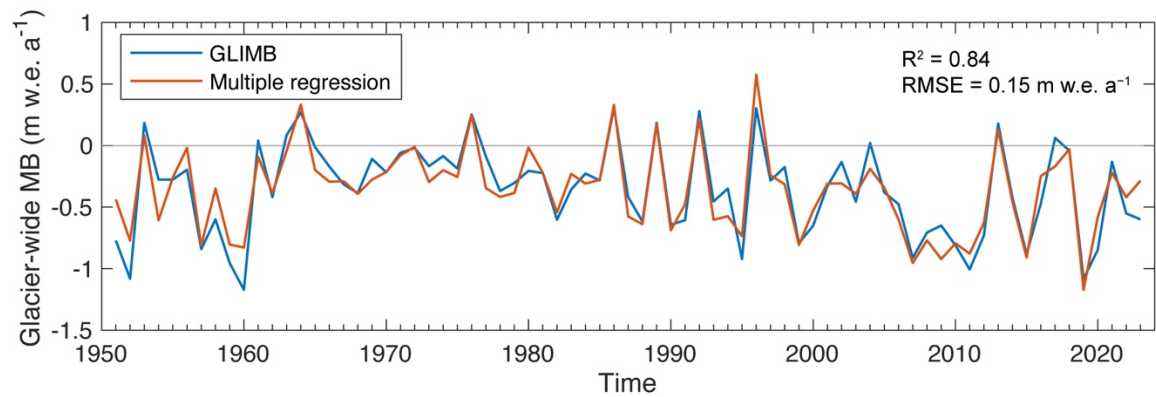

**Figure S9: Glacier-wide mass balance from GLIMB (blue) and multiple regression analysis using the air temperature and snowfall (orange). The coefficient of determination ( $R^2$ ) and RMSE of the regression are given.**

45

|                                                    | Estimate | Standard error | t-Stat | $p <$ |
|----------------------------------------------------|----------|----------------|--------|-------|
| Intercept                                          | -1.58    | 0.08           | -17.8  | 0.001 |
| Summer mean air temperature ( $^{\circ}\text{C}$ ) | -0.28    | 0.02           | -13.7  | 0.001 |
| Snowfall ( $\text{m w.e. a}^{-1}$ )                | 2.80     | 0.22           | -12.7  | 0.001 |

**Table S1: Results of multiple regression analysis for estimating the annual glacier mass balance ( $\text{m w.e. a}^{-1}$ ) using summer mean air temperature and snowfall.**

50

|                 | Year | Summer GBI (m) |
|-----------------|------|----------------|
| High-GBI period | 2019 | 5567           |
|                 | 2012 | 5564           |
|                 | 2016 | 5547           |
|                 | 2011 | 5545           |
|                 | 2007 | 5543           |
| Low-GBI period  | 1972 | 5448           |
|                 | 1994 | 5449           |
|                 | 1983 | 5451           |
|                 | 1976 | 5457           |
|                 | 1992 | 5483           |

**Table S2: Five years with the highest and lowest summer GBI and their values used for the atmospheric composite analysis shown in Fig. 9.**
